# Supplementary material
Source: ML conference proceedings conference paper supplement (https://proceedings.mlr.press/v95/shen18b.html)
Supplement: Supplementary file [file shen18b-supp.pdf]

# Supplementary Material: Unsupervised Heterogeneous Domain Adaptation with Sparse Feature Transformation

## 1. Minimization Over $B$

Given the current fixed  $A^{(k)}$  and  $\Lambda^{(k)}$ ,  $B$  can be updated by minimizing the augmented Lagrangian:

$$\begin{aligned} B^{(k+1)} &:= \arg \min_B L_\rho(A^{(k)}, B, \Lambda^{(k)}) \\ &:= \arg \min_B \ell(B) + \frac{\gamma}{q} \|B\|_{p,q}^q \end{aligned} \quad (10)$$

where the smooth part of function is

$$\ell(B) = \frac{1}{2} \left\| A^{(k)\top} C_s B - C_t \right\|_F^2 + \frac{\alpha}{2} \|X_s^0 B - X_t^0\|_F^2 - \text{tr}(\Lambda^{(k)\top} B) + \frac{\rho}{2} \|A^{(k)} - B\|_F^2$$

This minimization problem is a convex quadratic programming with a non-smooth sparsity regularizer. We solve it using a fast proximal gradient descent method with a quadratic convergence rate (Beck and Teboulle, 2009), which tackles Eq.(10) by solving a sequence of intermediate problems iteratively with proximity operators. The algorithm is given in Algorithm 1 below. The convergence of the algorithm is proved in (Beck and Teboulle, 2009).

---

### Algorithm 1 Fast Proximal Gradient Descent Algorithm

---

**Initialization:**  $Q^{(1)} = B^{(0)}$ =starting point,  $\beta_1 = 1$ ,  $t = 0$ .

**For** iter = 1:maxiters

1. Set  $t = t + 1$

2. Update:  $B^{(t)} = \mathcal{P}_\eta(Q^{(t)})$ ,  $\beta_{t+1} = \frac{1 + \sqrt{1 + 4\beta_t^2}}{2}$ ,

$$Q^{(t+1)} = B^{(t)} + \left( \frac{\beta_t - 1}{\beta_{t+1}} \right) (B^{(t)} - B^{(t-1)})$$

**End For**

---

For the  $t$ -th iteration, the intermediate problem at point  $Q^{(t)}$  is in the following form:

$$\mathcal{P}_\eta(Q^{(t)}) = \arg \min_B \left\{ \frac{1}{2} \|B - \widehat{Q}^{(t)}\| + \frac{\gamma}{q\eta} \|B\|_{p,q}^q \right\} \quad (11)$$

where  $\widehat{Q}^{(t)}$  is derived from the gradient of  $\ell(Q^{(t)})$  such that

$$\widehat{Q}^{(t)} = Q^{(t)} - \frac{1}{\eta} \nabla \ell(Q^{(t)})$$

and  $\eta$  is the Lipschitz constant of the general gradient function  $\nabla\ell(B)$ . The gradient can be computed as

$$\nabla\ell(B) = \left( C_s^\top A^{(k)} A^{(k)\top} C_s + \alpha X_s^{0\top} X_s^0 + \rho I \right) B - \left( C_s^\top A^{(k)} C_t + \alpha X_s^{0\top} X_t^0 + \Lambda^{(k)} + \rho A^{(k)} \right)$$

A Lipschitz constant  $\eta$  of  $\nabla\ell(B)$  needs to satisfy the property

$$\|\nabla\ell(B) - \nabla\ell(B')\|_F \leq \eta \|B - B'\|_F, \text{ for any feasible } B, B'.$$

**Lemma 1** *Let*

$$\eta = \sigma_{\max} \left( C_s^\top A^{(k)} A^{(k)\top} C_s + \alpha X_s^{0\top} X_s^0 + \rho I \right),$$

where  $\sigma_{\max}(\cdot)$  denotes the largest singular value of the corresponding matrix. Then  $\eta$  is a Lipschitz constant of  $\nabla\ell(B)$ .

**Proof** Let  $H = C_s^\top A^{(k)} A^{(k)\top} C_s + \alpha X_s^{0\top} X_s^0 + \rho I$ . We have the following derivations

$$\begin{aligned} & \|\nabla\ell(B) - \nabla\ell(B')\|_F \\ &= \left\| \left( C_s^\top A^{(k)} A^{(k)\top} C_s + \alpha X_s^{0\top} X_s^0 + \rho I \right) (B - B') \right\|_F \\ &= \|H(B - B')\|_F \\ &= \left( \sum_j \|H(B_{:j} - B'_{:j})\|_2^2 \right)^{1/2} \\ &\leq \left( \|H\|_2^2 \sum_j \|B_{:j} - B'_{:j}\|_2^2 \right)^{1/2} \quad (\text{since spectral norm is induced by the Euclidean norm}) \\ &= \|H\|_2 \|B - B'\|_F \\ &= \sigma_{\max}(H) \|B - B'\|_F \end{aligned}$$

where  $\|\cdot\|_2$  denotes the spectral norm of the corresponding matrix or the Euclidean norm of a vector;  $B_{:j}$  denotes the  $j$ -th column of matrix  $B$ . ■

The nice property about the intermediate problem in Eq.(11) is that it allows us to exploit closed-form solutions for the proximity operator  $\mathcal{P}_\eta(Q^{(t)})$  with either the  $\ell_1$ -norm regularizer ( $p = 1$  and  $q = 1$ ) or the  $\ell_{1,2}$ -norm regularizer ( $p = 1$  and  $q = 2$ ). According to (Kowalski et al., 2009), we have the following closed-form solution for the proximity operations:

**If  $p = 1$  and  $q = 1$  ( $\ell_1$ -norm),** we have

$$\mathcal{P}_\eta(Q^{(t)}) = \text{sign}(\widehat{Q}^{(t)}) \circ \left( |\widehat{Q}^{(t)}| - \frac{\gamma}{\eta} \right)_+$$

where  $(\cdot)_+ = \max(0, \cdot)$  and  $\circ$  denotes the entrywise Hadamard product operator.

If  $p = 1$  and  $q = 2$  ( $\ell_{1,2}$ -norm), we have

$$\mathcal{P}_\eta(Q^{(t)}) = \tilde{Q}$$

such that

$$\tilde{Q}_{i,j} = \text{sign}(\hat{Q}_{i,j}^{(t)}) \left( |\hat{Q}_{i,j}^{(t)}| - \frac{\gamma \sum_{r=1}^{m_j} \vec{Q}_{r,j}}{(\eta + \gamma m_j) \|\hat{Q}_{:j}^{(t)}\|_2} \right)_+$$

where  $\vec{Q}_{:j}$  denotes a reordered  $j$ -th column  $|\hat{Q}_{:j}^{(t)}|$  with a descending order of the entries, and the corresponding  $m_j$  is the number such that

$$\begin{aligned} \vec{Q}_{m_j+1,j} &\leq \frac{\gamma}{\eta} \sum_{r=1}^{m_j+1} (\vec{Q}_{r,j} - \vec{Q}_{m_j+1,j}) \\ \vec{Q}_{m_j,j} &> \frac{\gamma}{\eta} \sum_{r=1}^{m_j} (\vec{Q}_{r,j} - \vec{Q}_{m_j,j}) \end{aligned}$$

## References

- A. Beck and M. Teboulle. A fast iterative shrinkage-thresholding algorithm for linear inverse problems. *SIAM journal on imaging sciences*, 2(1):183–202, 2009.
- M. Kowalski, M. Szafranski, and L. Ralaivola. Multiple indefinite kernel learning with mixed norm regularization. In *Proceedings of the 26th Annual International Conference on Machine Learning (ICML)*, pages 545–552. ACM, 2009.
